# Supplementary material for: A theoretical study on charge transport of dithiolene nickel complexes
Source: Royal Society of Chemistry journal article supplement (doi:10.1039/c5cp07277h), 2016-01-01
Supplement: c5cp07277h1.pdf [file c5cp07277h1.pdf]

## Supplementary Information

### Theoretical Study on Charge Transport of Dithiolene Nickel Complexes

Vu Thi Thu Huong, Truong Ba Tai and Minh Tho Nguyen

Department of Chemistry, KU Leuven, B-3001 Leuven, Belgium

Email: minh.nguyen@chem.kuleuven.be

Supplementary information contains *i*) shapes of molecules **1a-3a** and **1b-3b** at neutral, anionic and cationic states (Fig. S1) and *ii*) XYZ-coordinates of the molecules obtained at the PBE/6-31G(d,p) level of theory (Table S1).

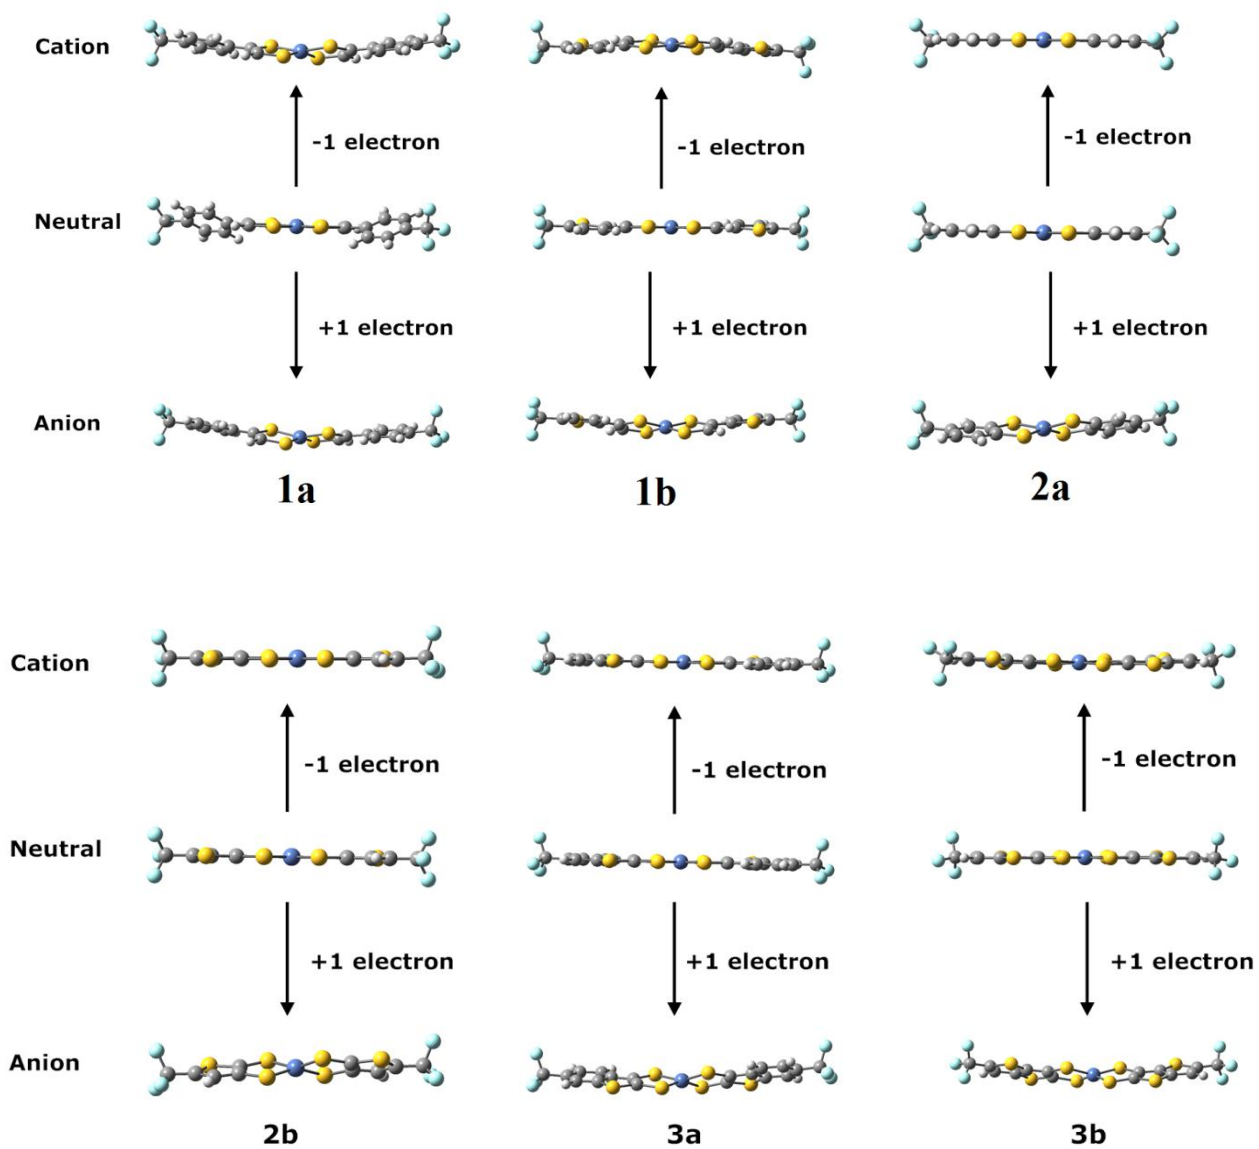

**Fig. S1** Shapes of molecules **1a-3a** and **1b-3b** at neutral, anionic and cationic states obtained at the PBE/6-31G(d,p) level of theory

**Table S1.** Total energy (a.u.) and differences in energy (a.u) of compounds **1a-3a** and **1b-3b** at neutral state obtained from PBE/6-31G(d,p) level of theory

|           | E(CS)        | E(CSBS)      | E(OS)        | $\Delta E(\text{CS-CSBS})$ | $\Delta E(\text{CS-OS})$ |
|-----------|--------------|--------------|--------------|----------------------------|--------------------------|
| <b>1a</b> | -4389.615099 | -4389.615099 | -4389.615099 | 0.00000                    | 0.00000                  |
| <b>1b</b> | -5030.968974 | -5030.968974 | -5030.968974 | 0.00000                    | 0.00000                  |
| <b>2a</b> | -4234.991936 | -4234.991962 | -4234.99196  | 0.00003                    | 0.00002                  |
| <b>2b</b> | -4876.340695 | -4876.340695 | -4876.340695 | 0.00000                    | 0.00000                  |
| <b>3a</b> | -5183.278631 | -5183.278631 | -5183.278631 | 0.00000                    | 0.00000                  |
| <b>3b</b> | -5824.613895 | -5824.613895 | -5824.613896 | 0.00000                    | 0.00000                  |

**Table S2.** Total energy (a.u.) and differences in energy (a.u) of compounds **1a-3a** and **1b-3b** at neutral state obtained from B3LYP/6-31G(d,p) level of theory

|           | E(CS)        | E(CSBS)      | E(OS)         | $\Delta E(\text{CS-CSBS})$ | $\Delta E(\text{CS-OS})$ |
|-----------|--------------|--------------|---------------|----------------------------|--------------------------|
| <b>1a</b> | -4391.9900   | -4391.9900   | -4391.9900442 | 0.00000                    | 0.00000                  |
| <b>1b</b> | -5033.489815 | -5033.489815 | -5033.4898154 | 0.00000                    | 0.00000                  |
| <b>2a</b> | -4237.1588   | -4237.1593   | -4237.1593045 | 0.00050                    | 0.00050                  |
| <b>2b</b> | -4878.6585   | -4878.6585   | -4878.6585224 | 0.00000                    | 0.00000                  |
| <b>3a</b> | -5185.9821   | -5185.9821   | -5185.9821099 | 0.00000                    | 0.00001                  |
| <b>3b</b> | -5827.4646   | -5827.4646   | -5827.4646150 | 0.00000                    | 0.00000                  |

CS: Closed shell singlet state

CSBS: Closed shell singlet – broken symmetry by applying “stable=opt” for single point calculations

OS: Open shell singlet state by using keyword guess=mix for optimization

**Table S2** the XYZ-coordinates of the molecules obtained at the PBE/6-31G(d,p) level of theory

| <b>Compound 1a</b> |              |              |              |  |
|--------------------|--------------|--------------|--------------|--|
| 28                 | 0.001401000  | 0.013318000  | -0.057608000 |  |
| 16                 | 0.742905000  | 2.015556000  | -0.085314000 |  |
| 16                 | -1.972954000 | 0.821519000  | 0.013369000  |  |
| 16                 | 1.975905000  | -0.796191000 | -0.019339000 |  |
| 16                 | -0.739520000 | -1.988854000 | -0.100907000 |  |
| 6                  | -3.029538000 | -0.557370000 | -0.008183000 |  |
| 6                  | -2.438936000 | -1.815059000 | -0.059652000 |  |
| 6                  | 2.442709000  | 1.840653000  | -0.066103000 |  |
| 6                  | 3.033249000  | 0.582255000  | -0.036416000 |  |
| 6                  | 4.492093000  | 0.373619000  | -0.021952000 |  |
| 6                  | -4.488503000 | -0.351704000 | 0.023395000  |  |
| 6                  | 5.355690000  | 1.337811000  | 0.549746000  |  |
| 6                  | 5.065739000  | -0.792296000 | -0.578708000 |  |
| 6                  | -5.343291000 | -1.321197000 | 0.599244000  |  |
| 6                  | -5.070470000 | 0.818837000  | -0.514713000 |  |
| 1                  | 4.936396000  | 2.232315000  | 1.018036000  |  |
| 1                  | 4.415334000  | -1.539608000 | -1.041083000 |  |
| 1                  | -4.425882000 | 1.575938000  | -0.969309000 |  |
| 1                  | -4.915841000 | -2.213603000 | 1.064159000  |  |
| 6                  | 6.738001000  | 1.146018000  | 0.558836000  |  |
| 6                  | 6.447703000  | -0.987102000 | -0.567198000 |  |
| 6                  | -6.452875000 | 1.008861000  | -0.489272000 |  |
| 6                  | -6.726074000 | -1.133750000 | 0.623148000  |  |
| 1                  | 6.880032000  | -1.885777000 | -1.013536000 |  |
| 1                  | -7.374501000 | -1.882671000 | 1.084396000  |  |
| 6                  | 7.290264000  | -0.017836000 | -0.000098000 |  |
| 6                  | -7.287235000 | 0.031774000  | 0.076789000  |  |
| 1                  | 7.394546000  | 1.898590000  | 1.002382000  |  |
| 1                  | -6.890572000 | 1.917926000  | -0.908628000 |  |
| 6                  | 8.778654000  | -0.252201000 | 0.069005000  |  |
| 6                  | -8.785328000 | 0.203903000  | 0.045891000  |  |
| 9                  | 9.475573000  | 0.915395000  | -0.000008000 |  |
| 9                  | 9.211351000  | -1.053329000 | -0.942097000 |  |
| 9                  | 9.131704000  | -0.857539000 | 1.238282000  |  |
| 9                  | -9.383670000 | -0.403954000 | 1.106820000  |  |
| 9                  | -9.143865000 | 1.516277000  | 0.064049000  |  |
| 9                  | -9.323807000 | -0.341965000 | -1.081587000 |  |
| 1                  | 3.035016000  | 2.759101000  | -0.121108000 |  |
| 1                  | -3.031809000 | -2.732901000 | -0.118880000 |  |
| <b>Compound 1b</b> |              |              |              |  |
| 28                 | 0.000000000  | 0.000000000  | 0.000000000  |  |
| 16                 | 1.849508000  | 1.070352000  | -0.034573000 |  |
| 16                 | -1.001340000 | 1.883751000  | -0.067070000 |  |
| 16                 | 1.001340000  | -1.883751000 | 0.067068000  |  |
| 16                 | -1.849508000 | -1.070352000 | 0.034573000  |  |
| 6                  | -2.659881000 | 1.486975000  | -0.070227000 |  |

|                    |              |              |              |
|--------------------|--------------|--------------|--------------|
| 6                  | -3.080953000 | 0.159537000  | -0.026649000 |
| 6                  | 3.080953000  | -0.159537000 | 0.026648000  |
| 6                  | 2.659881000  | -1.486975000 | 0.070226000  |
| 6                  | 4.475014000  | 0.245524000  | 0.030981000  |
| 6                  | -4.475014000 | -0.245524000 | -0.030982000 |
| 6                  | 5.001474000  | 1.533326000  | 0.099942000  |
| 6                  | -5.001474000 | -1.533326000 | -0.099944000 |
| 1                  | 3.366933000  | -2.322454000 | 0.117107000  |
| 1                  | 4.368869000  | 2.419841000  | 0.168532000  |
| 1                  | -4.368869000 | -2.419841000 | -0.168536000 |
| 1                  | -3.366933000 | 2.322454000  | -0.117109000 |
| 6                  | 6.977459000  | 0.305508000  | -0.013845000 |
| 6                  | 6.417028000  | 1.565826000  | 0.076420000  |
| 6                  | -6.417028000 | -1.565826000 | -0.076422000 |
| 6                  | -6.977459000 | -0.305508000 | 0.013845000  |
| 1                  | 7.018671000  | 2.474260000  | 0.123584000  |
| 1                  | -7.018671000 | -2.474259000 | -0.123587000 |
| 16                 | 5.769659000  | -0.942154000 | -0.074075000 |
| 16                 | -5.769659000 | 0.942154000  | 0.074076000  |
| 6                  | -8.433932000 | 0.037538000  | 0.012205000  |
| 6                  | 8.433932000  | -0.037538000 | -0.012204000 |
| 9                  | -9.183783000 | -1.076177000 | 0.213254000  |
| 9                  | -8.739061000 | 0.937678000  | 0.987027000  |
| 9                  | -8.826023000 | 0.590950000  | -1.168974000 |
| 9                  | 8.826023000  | -0.590950000 | 1.168976000  |
| 9                  | 8.739062000  | -0.937679000 | -0.987025000 |
| 9                  | 9.183783000  | 1.076177000  | -0.213253000 |
| <b>Compound 2a</b> |              |              |              |
| 28                 | 0.000000000  | 0.000000000  | -0.047443000 |
| 16                 | 1.694854000  | -1.300851000 | -0.038540000 |
| 16                 | -1.215800000 | -1.761745000 | -0.045137000 |
| 16                 | 1.215799000  | 1.761744000  | -0.045137000 |
| 16                 | -1.694854000 | 1.300850000  | -0.038538000 |
| 6                  | -2.847542000 | -1.171776000 | -0.027315000 |
| 6                  | -3.067375000 | 0.237807000  | -0.023177000 |
| 6                  | 3.067375000  | -0.237807000 | -0.023179000 |
| 6                  | 2.847542000  | 1.171776000  | -0.027315000 |
| 6                  | -4.388848000 | 0.745114000  | -0.006293000 |
| 1                  | 4.562248000  | -1.823470000 | -0.003969000 |
| 6                  | 5.459754000  | 0.138887000  | 0.004606000  |
| 6                  | -5.459753000 | -0.138886000 | 0.004610000  |
| 6                  | 4.388848000  | -0.745114000 | -0.006296000 |
| 1                  | -4.562247000 | 1.823470000  | -0.003965000 |
| 6                  | 3.957176000  | 2.055021000  | -0.018044000 |
| 1                  | 3.785236000  | 3.134639000  | -0.025037000 |
| 6                  | 5.245081000  | 1.543847000  | -0.002410000 |
| 1                  | 6.105159000  | 2.218070000  | -0.001071000 |
| 6                  | -3.957176000 | -2.055021000 | -0.018042000 |
| 1                  | -3.785237000 | -3.134639000 | -0.025036000 |
| 6                  | -5.245081000 | -1.543847000 | -0.002407000 |

|                    |              |              |              |
|--------------------|--------------|--------------|--------------|
| 1                  | -6.105159000 | -2.218070000 | -0.001066000 |
| 6                  | 6.878189000  | -0.373623000 | 0.057424000  |
| 6                  | -6.878188000 | 0.373624000  | 0.057424000  |
| 9                  | -7.454306000 | 0.093621000  | 1.259798000  |
| 9                  | -7.649913000 | -0.218208000 | -0.896305000 |
| 9                  | -6.947634000 | 1.716912000  | -0.127460000 |
| 9                  | 7.454291000  | -0.093650000 | 1.259813000  |
| 9                  | 6.947637000  | -1.716907000 | -0.127491000 |
| 9                  | 7.649925000  | 0.218233000  | -0.896280000 |
| <b>Compound 2b</b> |              |              |              |
| 28                 | 0.000000000  | 0.000000000  | -0.000002000 |
| 16                 | -1.507972000 | 1.531555000  | -0.000014000 |
| 16                 | 1.427009000  | 1.611127000  | -0.000018000 |
| 16                 | -1.427009000 | -1.611127000 | 0.000014000  |
| 16                 | 1.507972000  | -1.531554000 | 0.000011000  |
| 6                  | 2.923112000  | 0.776582000  | -0.000011000 |
| 6                  | 2.982197000  | -0.634153000 | 0.000002000  |
| 6                  | -2.982197000 | 0.634153000  | -0.000003000 |
| 6                  | -2.923112000 | -0.776582000 | 0.000009000  |
| 6                  | 4.322308000  | -1.129551000 | 0.000006000  |
| 1                  | -4.596274000 | 2.184589000  | -0.000014000 |
| 16                 | 4.521742000  | 1.492461000  | -0.000018000 |
| 6                  | -5.245375000 | 0.113235000  | 0.000005000  |
| 6                  | 5.245375000  | -0.113235000 | -0.000003000 |
| 16                 | -4.521742000 | -1.492461000 | 0.000018000  |
| 6                  | -4.322308000 | 1.129551000  | -0.000006000 |
| 1                  | 4.596274000  | -2.184589000 | 0.000016000  |
| 6                  | 6.737756000  | -0.257746000 | -0.000001000 |
| 6                  | -6.737756000 | 0.257745000  | 0.000005000  |
| 9                  | 7.295379000  | 0.329163000  | 1.092580000  |
| 9                  | 7.088443000  | -1.567318000 | 0.000004000  |
| 9                  | 7.295382000  | 0.329156000  | -1.092583000 |
| 9                  | -7.295381000 | -0.329167000 | -1.092572000 |
| 9                  | -7.295379000 | -0.329154000 | 1.092590000  |
| 9                  | -7.088443000 | 1.567317000  | -0.000002000 |
| <b>Compound 3a</b> |              |              |              |
| 28                 | 0.000077000  | 0.000091000  | -0.017119000 |
| 16                 | 1.772902000  | -1.207828000 | -0.017083000 |
| 16                 | -1.097141000 | -1.856102000 | -0.017134000 |
| 16                 | 1.097213000  | 1.856296000  | -0.017128000 |
| 16                 | -1.772885000 | 1.207782000  | -0.017093000 |
| 6                  | -2.725478000 | -1.323284000 | -0.017230000 |
| 6                  | -3.044449000 | 0.047184000  | -0.016400000 |
| 6                  | 3.044435000  | -0.047172000 | -0.016378000 |
| 6                  | 2.725489000  | 1.323323000  | -0.017237000 |
| 6                  | -4.465586000 | 0.290214000  | -0.014906000 |
| 16                 | -4.149540000 | -2.354324000 | -0.017709000 |
| 6                  | 5.202806000  | 0.928242000  | -0.014629000 |
| 6                  | -5.202809000 | -0.928274000 | -0.014625000 |

|                    |              |              |              |
|--------------------|--------------|--------------|--------------|
| 16                 | 4.149572000  | 2.354318000  | -0.017710000 |
| 6                  | 4.465569000  | -0.290217000 | -0.014886000 |
| 6                  | -6.599992000 | -0.942238000 | -0.015162000 |
| 6                  | -5.168175000 | 1.513468000  | -0.017512000 |
| 6                  | 5.168124000  | -1.513468000 | -0.017510000 |
| 6                  | 6.599993000  | 0.942225000  | -0.015085000 |
| 1                  | -4.613904000 | 2.456078000  | -0.022621000 |
| 1                  | 7.165021000  | 1.876577000  | -0.020368000 |
| 6                  | -7.271729000 | 0.288027000  | -0.016387000 |
| 6                  | -6.561159000 | 1.508135000  | -0.018188000 |
| 6                  | 6.561100000  | -1.508149000 | -0.018175000 |
| 6                  | 7.271685000  | -0.288023000 | -0.016320000 |
| 1                  | -7.164972000 | -1.876615000 | -0.020469000 |
| 1                  | -7.114752000 | 2.449874000  | -0.028469000 |
| 1                  | 4.613827000  | -2.456039000 | -0.022626000 |
| 6                  | -8.780002000 | 0.317556000  | 0.038765000  |
| 9                  | -9.327139000 | -0.871252000 | -0.332835000 |
| 9                  | -9.288330000 | 1.281174000  | -0.777001000 |
| 9                  | -9.223556000 | 0.590628000  | 1.297818000  |
| 1                  | 7.114687000  | -2.449882000 | -0.028437000 |
| 6                  | 8.779923000  | -0.317624000 | 0.038752000  |
| 9                  | 9.327106000  | 0.871362000  | -0.332029000 |
| 9                  | 9.288136000  | -1.280724000 | -0.777721000 |
| 9                  | 9.223507000  | -0.591672000 | 1.297625000  |
| <b>Compound 3b</b> |              |              |              |
| 28                 | 0.000000000  | 0.000001000  | 0.004791000  |
| 16                 | 1.861296000  | -1.083066000 | -0.003632000 |
| 16                 | -0.955484000 | -1.926075000 | 0.011866000  |
| 16                 | 0.955485000  | 1.926073000  | 0.012663000  |
| 16                 | -1.861295000 | 1.083070000  | -0.003310000 |
| 6                  | -2.619361000 | -1.524364000 | 0.005025000  |
| 6                  | -3.040914000 | -0.173185000 | -0.001317000 |
| 6                  | 3.040915000  | 0.173187000  | -0.001100000 |
| 6                  | 2.619363000  | 1.524364000  | 0.005742000  |
| 6                  | -4.462008000 | -0.089941000 | -0.003791000 |
| 16                 | -3.957364000 | -2.674804000 | 0.005787000  |
| 6                  | 5.105145000  | 1.337320000  | -0.000924000 |
| 6                  | -5.105142000 | -1.337319000 | -0.001686000 |
| 16                 | 3.957367000  | 2.674803000  | 0.007006000  |
| 6                  | 4.462009000  | 0.089943000  | -0.003536000 |
| 1                  | -7.212255000 | -2.098016000 | -0.014291000 |
| 1                  | 7.212257000  | 2.098020000  | -0.013158000 |
| 16                 | 5.612924000  | -1.216502000 | -0.025358000 |
| 16                 | -5.612924000 | 1.216511000  | -0.025146000 |
| 6                  | 6.519434000  | 1.256726000  | -0.012851000 |
| 6                  | 6.933340000  | -0.062952000 | -0.026089000 |
| 6                  | -6.519432000 | -1.256722000 | -0.013632000 |
| 6                  | -6.933339000 | 0.062960000  | -0.026373000 |
| 6                  | -8.350197000 | 0.547770000  | 0.002146000  |
| 6                  | 8.350194000  | -0.547775000 | 0.002379000  |

|   |              |              |              |
|---|--------------|--------------|--------------|
| 9 | 9.208665000  | 0.484286000  | -0.200176000 |
| 9 | 8.666261000  | -1.122062000 | 1.195296000  |
| 9 | 8.577359000  | -1.485039000 | -0.957498000 |
| 9 | -8.666236000 | 1.122008000  | 1.195094000  |
| 9 | -9.208661000 | -0.484291000 | -0.200437000 |
| 9 | -8.577401000 | 1.485069000  | -0.957687000 |
